# Supplementary material for: SOCIODEMOGRAPHIC CHARACTERISTICS AND COVID-19 TESTING RATES: SPATIO-TEMPORAL PATTERNS AND IMPACT OF TEST ACCESSIBILITY IN SWEDEN
Source: bioRxiv or medRxiv preprint supplement (doi:10.1101/2020.12.15.20248247), 2023-05-12
Supplement: Supplementary file [file media-1.pdf]

# Large differences in community COVID-19 testing across geographic areas in a Swedish region with 385,000 inhabitants

Beatrice Kennedy <sup>1\*</sup>, Mats Martinell <sup>2,3\*</sup>, Ulf Hammar <sup>1</sup>, Vera van Zoest <sup>4</sup>, Robert S Kristiansson <sup>2,3</sup>, Hugo Fitipaldi <sup>5</sup>, Neli Tsereteli <sup>5</sup>, Georgios Varotsis <sup>1</sup>, Koen F Dekkers <sup>1</sup>, Jonas Björk <sup>6,7</sup>, Tove Fall <sup>1</sup>

## Affiliations

1. Department of Medical Sciences, Molecular Epidemiology, and Science for Life Laboratory, Uppsala University, Sweden
2. Department of Public Health and Caring Sciences, Health Services Research, Uppsala University, Sweden
3. Primary Care and Health, Uppsala County Council, Sweden
4. Department of Information Technology, Uppsala University, Sweden
5. Genetic and Molecular Epidemiology Unit, Department of Clinical Sciences Malmö, Lund University Diabetes Centre, Skåne University Hospital, Malmö, Sweden
6. Division of Occupational and Environmental Medicine, Lund University, Lund, Sweden
7. Clinical Studies Sweden, Forum South, Skåne University Hospital, Lund, Sweden

\*Shared first authorship

## Corresponding author

Tove Fall, Department of Medical Sciences, Molecular Epidemiology and Science for Life Laboratory, Uppsala University, 751 85 Uppsala, Sweden

## Supplementary Material

**Supplementary Figure 1. Correlation matrices for the control and the exposure variables in postal code areas within Uppsala City and Uppsala County (excluding Uppsala City). Correlations are weighted by the size of the population ( $\geq 18$  years) for each postal code. The darker colors indicate stronger correlation.**

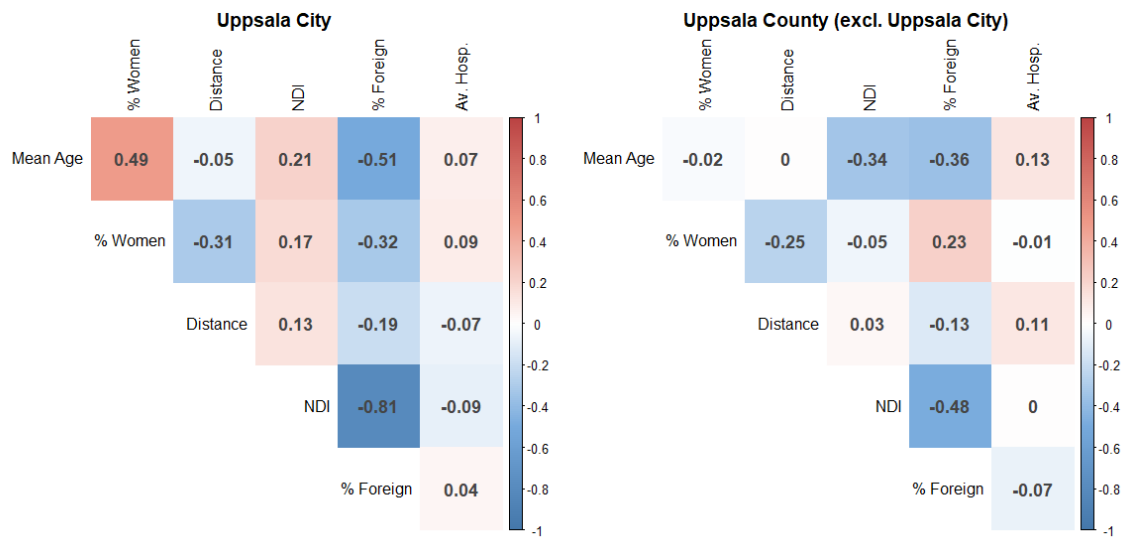

**Supplementary Table 1. Testing rates and testing positivity in Uppsala City and Uppsala County. Values are presented as median (first and third quartile) unless stated otherwise.**

|                                                                                                   | <b>Uppsala City (postal code 75)</b> | <b>Uppsala County* (postal codes 74 and 81)</b> |
|---------------------------------------------------------------------------------------------------|--------------------------------------|-------------------------------------------------|
| Postal code areas                                                                                 | N = 146                              | N = 200                                         |
| Average testing rate per 100,000 inhabitants $\geq 18$ years <sup>1</sup>                         | 793 (702-901)                        | 690 (583-799)                                   |
| Average number of weekly positive tests per 100,000 inhabitants aged $\geq 18$ years <sup>1</sup> | 38 (25-56)                           | 18 (0-36)                                       |
| Average test positivity <sup>1</sup> , %                                                          | 4.61 (3.26-6.94)                     | 2.72 (0.00-5.10)                                |

\*Excluding Uppsala City

<sup>1</sup>During the study period 24 June to 12 October 2020

**Supplementary Table 2. Univariable analysis of the association of area characteristics with COVID-19 testing rates in Uppsala City and Uppsala County.**

|                                                                                    | Uppsala City          |         | Uppsala County*      |         |
|------------------------------------------------------------------------------------|-----------------------|---------|----------------------|---------|
|                                                                                    | B (95% CI)            | p-value | B (95% CI)           | p-value |
| Distance to closest test station, km                                               | -5.95 (-11.47, -0.44) | 0.035   | -6.22 (-7.51, -4.92) | <0.001  |
| Neighbourhood deprivation index                                                    | 55.94 (31.32, 80.56)  | <0.001  | 39.36 (16.38, 62.35) | 0.001   |
| Proportion foreign background, %                                                   | -3.25 (-4.72, -1.78)  | <0.001  | -2.03 (-4.18, 0.13)  | 0.065   |
| Average daily number of hospitalized patients per 100,000 inhabitants <sup>1</sup> | -0.34 (-2.52, 1.83)   | 0.755   | -0.30 (-2.44, 1.84)  | 0.782   |

\*Excluding Uppsala City

<sup>1</sup>During the study period 24 June to 12 October 2020

B: beta; CI: confidence interval

**Supplementary Figure 2. Univariate association of area characteristics with area testing rates across the 146 postal code areas in Uppsala City. Means and confidence intervals predicted from a population weighted linear regression model. The range of the x-axis is from the 10th to the 90th percentile of the distribution of the variable in the Uppsala City data set. The ticks represent individual postal code values.**

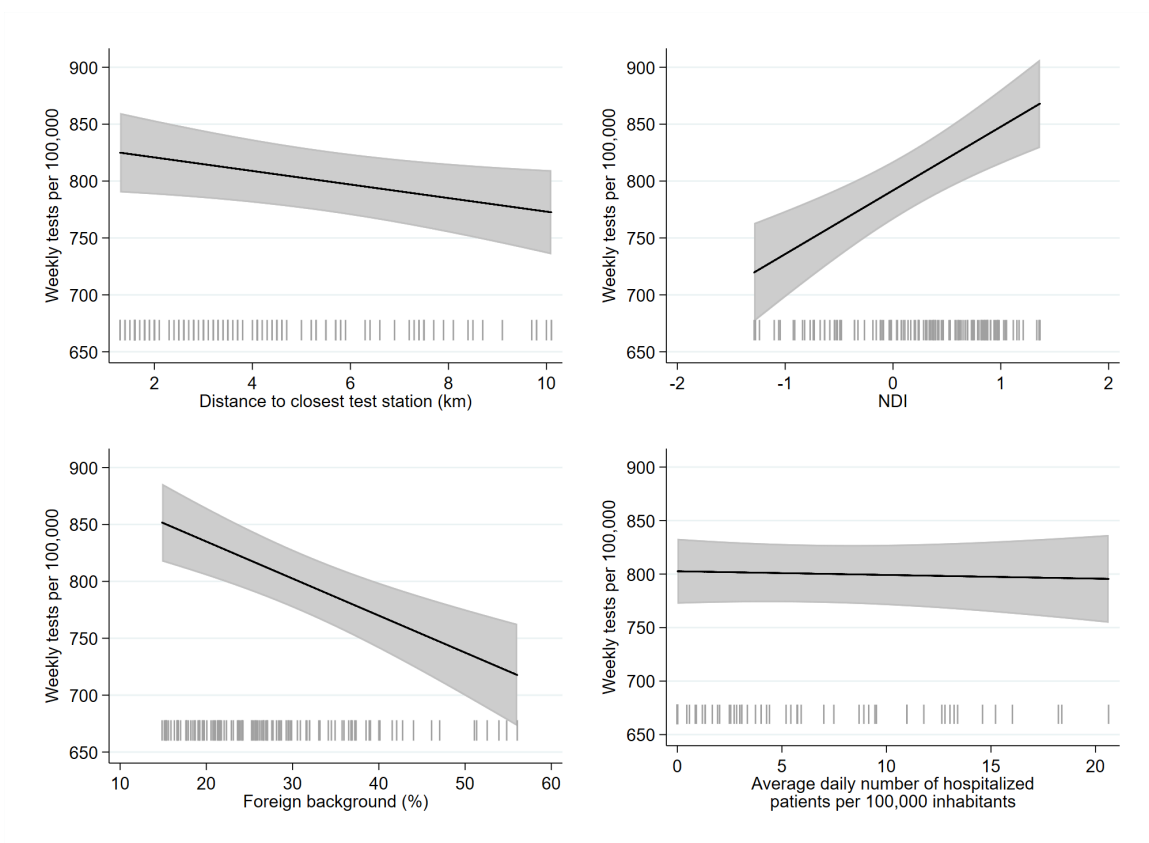

**Supplementary Figure 3. Univariate association of area characteristics with area testing rates across 200 postal code areas in Uppsala County, excluding Uppsala City. Means and confidence intervals are predicted from a population weighted linear regression model. The range of the x-axis is from the 10th to the 90th percentile of the distribution of the variable in the Uppsala County data set. The ticks represent individual postal code values.**

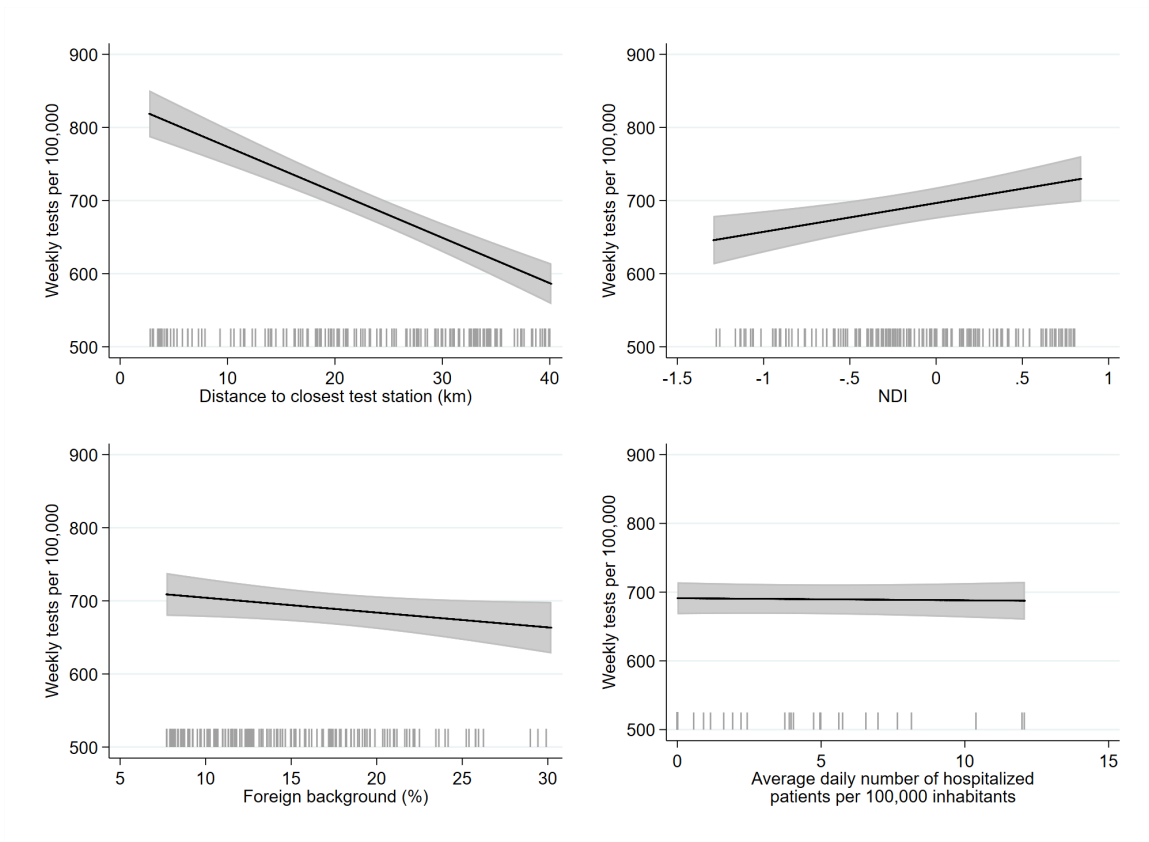

**Supplementary Table 3. Multivariable regression model estimates on the association of area characteristics with area testing rates across 146 postal code areas in Uppsala City and 200 postal code areas in Uppsala County. The multivariable analyses were performed on all four exposure variables simultaneously and further included the control variables mean age and proportion of women.**

|                                                                                    | Uppsala City           |         | Uppsala County*        |         |
|------------------------------------------------------------------------------------|------------------------|---------|------------------------|---------|
|                                                                                    | B (95% CI)             | p-value | B (95% CI)             | p-value |
| Distance to closest test station, km                                               | -8.02 (-13.02, -3.02)  | 0.002   | -6.47 (-7.66, -5.27)   | <0.001  |
| Neighbourhood deprivation index                                                    | -10.89 (-49.68, 27.90) | 0.580   | -13.21 (-38.86, 12.43) | 0.311   |
| Proportion foreign background, %                                                   | -6.21 (-8.90, -3.51)   | <0.001  | -6.43 (-8.88, -3.99)   | <0.001  |
| Average daily number of hospitalized patients per 100,000 inhabitants <sup>1</sup> | -0.00 (-1.76, 1.75)    | 0.998   | 1.05 (-0.54, 2.65)     | 0.193   |

\*Excluding Uppsala City

<sup>1</sup>During the study period 24 June to 12 October 2020

B: beta; CI: confidence interval

**Supplementary Table 4. Multivariable regression model estimates on the association of postal code area characteristics with testing rates across 146 postal code areas in Uppsala City and 200 postal code areas in Uppsala County, including only the 28,556 tests conducted at the four main test stations (Uppsala, Tierp, Enköping, Östhammar).**

|                                                                                    | Uppsala City           |         | Uppsala County*       |         |
|------------------------------------------------------------------------------------|------------------------|---------|-----------------------|---------|
|                                                                                    | B (95% CI)             | p-value | B (95% CI)            | p-value |
| Distance to closest test station, km                                               | -10.46 (-14.89, -6.03) | <0.001  | -7.52 (-8.55, -6.48)  | <0.001  |
| Neighbourhood deprivation index                                                    | -8.87 (-43.27, 25.53)  | 0.611   | -6.24 (-28.48, 16.01) | 0.581   |
| Proportion foreign background, %                                                   | -7.69 (-10.09, -5.30)  | <0.001  | -7.15 (-9.27, -5.03)  | <0.001  |
| Average daily number of hospitalized patients per 100,000 inhabitants <sup>1</sup> | 0.10 (-1.46, 1.66)     | 0.899   | 0.66 (-0.72, 2.04)    | 0.346   |

\*Excluding Uppsala City

<sup>1</sup>During the study period 24 June to 12 October 2020

B: beta; CI: confidence interval
